# Supplementary material for: An alternative CTCF isoform antagonizes canonical CTCF occupancy and changes chromatin architecture to promote apoptosis
Source: PubMed Central journal article supplement (PMC6449404; doi:10.1038/s41467-019-08949-w), 2019-04-04
Supplement: 41467_2019_8949_MOESM3_ESM.pdf [file 41467_2019_8949_MOESM3_ESM.pdf]

## **Description of Additional Supplementary Files**

File Name: Supplementary Data 1

Description: shRNA targets used in this study

File Name: Supplementary Data 2

Description: RT-qPCR primers used in this study

File Name: Supplementary Data 3

Description: Antibodies used in this study

File Name: Supplementary Data 4

Description: HiChIP data validation

File Name: Supplementary Data 5

Description: CHIP-qPCR primers used in this study

File Name: Supplementary Data 6

Description: Primers used for 3C experiments
