# Supplementary material for: An alternative CTCF isoform antagonizes canonical CTCF occupancy and changes chromatin architecture to promote apoptosis
Source: PubMed Central journal article supplement (PMC6449404; doi:10.1038/s41467-019-08949-w), 2019-04-04
Supplement: 41467_2019_8949_MOESM10_ESM.pdf [file 41467_2019_8949_MOESM10_ESM.pdf]

## Reporting Summary

Nature Research wishes to improve the reproducibility of the work that we publish. This form provides structure for consistency and transparency in reporting. For further information on Nature Research policies, see [Authors & Referees](#) and the [Editorial Policy Checklist](#).

### Statistics

For all statistical analyses, confirm that the following items are present in the figure legend, table legend, main text, or Methods section.

n/a Confirmed

- The exact sample size ( $n$ ) for each experimental group/condition, given as a discrete number and unit of measurement
- A statement on whether measurements were taken from distinct samples or whether the same sample was measured repeatedly
- The statistical test(s) used AND whether they are one- or two-sided  
*Only common tests should be described solely by name; describe more complex techniques in the Methods section.*
- A description of all covariates tested
- A description of any assumptions or corrections, such as tests of normality and adjustment for multiple comparisons
- A full description of the statistical parameters including central tendency (e.g. means) or other basic estimates (e.g. regression coefficient) AND variation (e.g. standard deviation) or associated estimates of uncertainty (e.g. confidence intervals)
- For null hypothesis testing, the test statistic (e.g.  $F$ ,  $t$ ,  $r$ ) with confidence intervals, effect sizes, degrees of freedom and  $P$  value noted  
*Give  $P$  values as exact values whenever suitable.*
- For Bayesian analysis, information on the choice of priors and Markov chain Monte Carlo settings
- For hierarchical and complex designs, identification of the appropriate level for tests and full reporting of outcomes
- Estimates of effect sizes (e.g. Cohen's  $d$ , Pearson's  $r$ ), indicating how they were calculated

*Our web collection on [statistics for biologists](#) contains articles on many of the points above.*

### Software and code

Policy information about [availability of computer code](#)

Data collection

N/A

Data analysis

N/A

For manuscripts utilizing custom algorithms or software that are central to the research but not yet described in published literature, software must be made available to editors/reviewers. We strongly encourage code deposition in a community repository (e.g. GitHub). See the Nature Research [guidelines for submitting code & software](#) for further information.

### Data

Policy information about [availability of data](#)

All manuscripts must include a [data availability statement](#). This statement should provide the following information, where applicable:

- Accession codes, unique identifiers, or web links for publicly available datasets
- A list of figures that have associated raw data
- A description of any restrictions on data availability

Our sequencing data from ChIP-seq, RNA-seq, HiChIP have been deposited in the Gene Expression Omnibus and the accession number NCBI GEO: GSE108869.

### Field-specific reporting

Please select the one below that is the best fit for your research. If you are not sure, read the appropriate sections before making your selection.

- Life sciences
- Behavioural & social sciences
- Ecological, evolutionary & environmental sciences

For a reference copy of the document with all sections, see [nature.com/documents/nr-reporting-summary-flat.pdf](http://nature.com/documents/nr-reporting-summary-flat.pdf)

## Life sciences study design

All studies must disclose on these points even when the disclosure is negative.

|                 |                                                                                                                                                                                                                                           |
|-----------------|-------------------------------------------------------------------------------------------------------------------------------------------------------------------------------------------------------------------------------------------|
| Sample size     | N/A                                                                                                                                                                                                                                       |
| Data exclusions | No data were excluded from the analyses.                                                                                                                                                                                                  |
| Replication     | All the experiments were performed at least two-biological replicates, and each biological replicates were performed several technical replicates. The detailed replication information are provided in the corresponding figure legends. |
| Randomization   | N/A                                                                                                                                                                                                                                       |
| Blinding        | N/A                                                                                                                                                                                                                                       |

## Reporting for specific materials, systems and methods

We require information from authors about some types of materials, experimental systems and methods used in many studies. Here, indicate whether each material, system or method listed is relevant to your study. If you are not sure if a list item applies to your research, read the appropriate section before selecting a response.

### Materials & experimental systems

| n/a                                 | Involvement in the study                                  |
|-------------------------------------|-----------------------------------------------------------|
| <input type="checkbox"/>            | <input checked="" type="checkbox"/> Antibodies            |
| <input type="checkbox"/>            | <input checked="" type="checkbox"/> Eukaryotic cell lines |
| <input checked="" type="checkbox"/> | <input type="checkbox"/> Palaeontology                    |
| <input checked="" type="checkbox"/> | <input type="checkbox"/> Animals and other organisms      |
| <input checked="" type="checkbox"/> | <input type="checkbox"/> Human research participants      |
| <input checked="" type="checkbox"/> | <input type="checkbox"/> Clinical data                    |

### Methods

| n/a                                 | Involvement in the study                           |
|-------------------------------------|----------------------------------------------------|
| <input type="checkbox"/>            | <input checked="" type="checkbox"/> ChIP-seq       |
| <input type="checkbox"/>            | <input checked="" type="checkbox"/> Flow cytometry |
| <input checked="" type="checkbox"/> | <input type="checkbox"/> MRI-based neuroimaging    |

## Antibodies

Antibodies used

Anti- $\beta$  Actin antibody, abcam, CatLog:ab3280  
 Anti-CTCF antibody, Millipore, CatLog:07-729  
 Anti-CTCF antibody, Active Motif, CatLog:61311  
 Anti-CTCF antibody, our lab, CatLog:NA  
 Anti-FLAG antibody, Sigma, CatLog:F1804  
 Anti-biotin, HRP-linked antibody, Cell Signaling Technology, CatLog:#7075  
 FLAG-M2 Magnetic beads, Sigma, CatLog:M8823  
 Anti-Tubulin antibody, Sigma, CatLog:T6074  
 Anti-RAD21 antibody, abcam, CatLog:ab992  
 Anti-H3 antibody, Cell Signaling Technology, CatLog:#4620

Validation

For those commercial antibodies, the validation statements are provided on the manufacturer's websites, and also the data provided in this manuscript.

## Eukaryotic cell lines

Policy information about [cell lines](#)

|                                                                      |                                                                                                |
|----------------------------------------------------------------------|------------------------------------------------------------------------------------------------|
| Cell line source(s)                                                  | 293T cell line, HeLa-S3 cell line.                                                             |
| Authentication                                                       | These cell lines were purchased from ATCC.                                                     |
| Mycoplasma contamination                                             | We confirmed that all cell lines used in this study are negative for mycoplasma contamination. |
| Commonly misidentified lines<br>(See <a href="#">ICLAC</a> register) | N/A                                                                                            |



## Methodology

|                         |                                                                                                                                                                                                                                                                                                                                                                                                                                                                                                                                                                                                                                                                                                                                                                                                                                                                                                                                                                                                                                                                                                                                                                                                                                                                                                                                                                                                                                                                                                                                                                                                                                                                                                                                                                                                                        |
|-------------------------|------------------------------------------------------------------------------------------------------------------------------------------------------------------------------------------------------------------------------------------------------------------------------------------------------------------------------------------------------------------------------------------------------------------------------------------------------------------------------------------------------------------------------------------------------------------------------------------------------------------------------------------------------------------------------------------------------------------------------------------------------------------------------------------------------------------------------------------------------------------------------------------------------------------------------------------------------------------------------------------------------------------------------------------------------------------------------------------------------------------------------------------------------------------------------------------------------------------------------------------------------------------------------------------------------------------------------------------------------------------------------------------------------------------------------------------------------------------------------------------------------------------------------------------------------------------------------------------------------------------------------------------------------------------------------------------------------------------------------------------------------------------------------------------------------------------------|
| Replicates              | For HiChIP experiments, we have performed two biological repeats. For ChIP-seq, since ChIP-seq data were highly convincible as the high overlapping ratio with the published ENCODE dataset, therefore, we did not perform biological replicates.                                                                                                                                                                                                                                                                                                                                                                                                                                                                                                                                                                                                                                                                                                                                                                                                                                                                                                                                                                                                                                                                                                                                                                                                                                                                                                                                                                                                                                                                                                                                                                      |
| Sequencing depth        | <p>For FLAG ChIP-seq<br/> FLAG_control, raw reads 32,386,788, high quality unique reads 23,594,792, read length 150 bp, paired-end.<br/> FLAG-CTCF overexpression, raw reads 50,256,287, high quality unique reads 36,468,522, read length 150 bp, paired-end.<br/> FLAG-CTCF-s overexpression, raw reads 35,551,107, high quality unique reads 26,084,762, read length 150 bp, paired-end.</p> <p>For CTCF ChIP-seq<br/> FLAG_input, raw reads 67,226,304, high quality unique reads 53,502,527, read length 75 bp, paired-end.<br/> FLAG_CTCF ChIP-seq, raw reads 65,523,895, high quality unique reads 53,118,020, read length 75 bp, paired-end.<br/> FLAG-CTCF-s_input, raw reads 71,073,427, high quality unique reads 57,334,292, read length 75 bp, paired-end.<br/> FLAG-CTCF-s_CTCF ChIP-seq, raw reads 60,420,904, high quality unique reads 47,904,732, read length 75 bp, paired-end.</p> <p>For RAD21 ChIP-seq<br/> FLAG_input, raw reads 67,226,304, high quality unique reads 54,204,191, read length 75 bp, single-end.<br/> FLAG_CTCF-s_input, raw reads 71,073,427, high quality unique reads 57,875,576, read length 75 bp, single-end.<br/> FLAG_RAD21 ChIP-seq, raw reads 29,358,349, high quality unique reads 19,601,476, read length 75 bp, single-end.<br/> FLAG-CTCF-s_RAD21 ChIP-seq, raw reads 31,950,672, high quality unique reads 24,098,525, read length 75 bp, single-end.</p> <p>For biotin ChIP-seq<br/> biotin-CTCF_bioChIP-seq, raw reads 26,074,975, high quality unique reads 15,694,355, read length 150 bp, paired-end.<br/> biotin-CTCF-s_bioChIP-seq, raw reads 32,603,177, high quality unique reads 20,600,686, read length 150 bp, paired-end.<br/> biotin_bioChIP-seq, raw reads 31,296,777, high quality unique reads 17,714,320, read length 150 bp, paired-end.</p> |
| Antibodies              | <p>For CTCF ChIP-seq, we used Anti-CTCF antibody purchased from Active Motif (CatLog:61311).<br/> For biotin ChIP-seq, we used streptavidin M-280 dynabeads purchased from Invitrogen (CatLog:11205D).<br/> For RAD21 ChIP-seq, we used Anti-RAD21 antibody purchased from abcam (CatLog:ab992).<br/> For FLAG ChIP-seq, we used FLAG-M2 beads purchased from sigma (CatLog:M8823).</p>                                                                                                                                                                                                                                                                                                                                                                                                                                                                                                                                                                                                                                                                                                                                                                                                                                                                                                                                                                                                                                                                                                                                                                                                                                                                                                                                                                                                                                |
| Peak calling parameters | <p>For FLAG ChIP-seq<br/> macs2 callpeak -t FLAG-CTCF.bam -c FLAG.bam -f BAMPE -g hs -n FLAG-CTCF -p 1e-4 -B -SPMR<br/> macs2 callpeak -t FLAG-CTCF-s.bam -c FLAG.bam -f BAMPE -g hs -n FLAG-CTCF-s -p 1e-4 -B -SPMR</p> <p>For CTCF ChIP-seq,<br/> macs2 callpeak -t FLAG_CTCF_ChIP-seq.bam FLAG_input.bam -f BAMPE -g hs -n FLAG_control_CTCF-peak -B -SPMR<br/> macs2 callpeak -t FLAG-CTCF-s_CTCF_ChIP-seq.bam -c FLAG-CTCF-s_input.bam -f BAMPE -g hs -n FLAG-CTCF-s_CTCF-peak -B -SPMR</p> <p>For RAD21 ChIP-seq, high quality unique reads were subsampled into 20M reads to call peaks.<br/> macs2 callpeak -t FLAG_RAD21_ChIP-seq_subsample.bed -c FLAG_input_subsample.bed -f BED -n FLAG_RAD21 -g hs -q 0.01 --nomodel --shift 0 --extsize 130 -B -SPMR<br/> macs2 callpeak -t FLAG-CTCF-s_RAD21_subsample.bed -c FLAG-CTCF-s_input_subsample.bed -f BED -n FLAG-CTCF-s_RAD21 -g hs -q 0.01 --nomodel --shift 0 --extsize 144 -B -SPMR</p> <p>For biotin ChIP-seq,<br/> macs2 callpeak -t biotin-CTCF_bioChIP.bam -c biotin_bioChIP.bam -f BAMPE -n biotin-CTCF -g hs -B -SPMR<br/> macs2 callpeak -t biotin-CTCF-s_bioChIP.bam -c biotin_bioChIP.bam -f BAMPE -n biotin-CTCF-s -g hs -B -SPMR</p>                                                                                                                                                                                                                                                                                                                                                                                                                                                                                                                                                                                                          |
| Data quality            | <p>For FLAG ChIP-seq, due to the background noise, we used macs2 parameter "p 1e-4", flag-CTCF peaks is 11,578, FLAG-CTCF-s peaks is 8,890. Of them, few peaks are above 5-fold enrichment.</p> <p>For CTCF ChIP-seq, we used FDR 1% (macs2, q = 0.01) as cutoff, and we got 74,386 CTCF peaks in FLAG control samples, and got 79,925 CTCF peaks in FLAG-CTCF-s overexpression samples. Of them, peaks above 5-fold enrichment is 69,755, 65,198, respectively.</p> <p>For RAD21 ChIP-seq, we used FDR 0.01 (macs2, q = 0.01) as cutoff, and we got 80,362 RAD21 peaks in FLAG control samples, 46,469 RAD21 peaks in FLAG-CTCF-s overexpression samples. Of them, 71,018, 43,201 peaks were above 5-fold enrichment, respectively.</p> <p>For biotin ChIP-seq, we used FDR 5% (macs2, q = 0.05) as cutoff, and we got 72,937 peaks for CTCF, 41,362 peaks for CTCF-s. Of them, 58,378, 20,938 peaks were above 5-fold enrichment, respectively.</p>                                                                                                                                                                                                                                                                                                                                                                                                                                                                                                                                                                                                                                                                                                                                                                                                                                                                  |
| Software                | <p>FastQC (v0.11.2), Reads qualification.<br/> TrimGalore (v0.4.4), adapter and low quality reads Trimming.<br/> Bowtie2 (v2.2.5) Reads alignment.<br/> samtools (v1.2), high-quality mapped reads selection.<br/> picard tools (v1.90), PCR duplicates removing.<br/> MACS2 (v2.1.0), Peak calling or differential peak analysis.<br/> bedtools (v2.25.0), peak overlapping analysis.</p>                                                                                                                                                                                                                                                                                                                                                                                                                                                                                                                                                                                                                                                                                                                                                                                                                                                                                                                                                                                                                                                                                                                                                                                                                                                                                                                                                                                                                             |

## Data deposition

- Confirm that both raw and final processed data have been deposited in a public database such as [GEO](#).
- Confirm that you have deposited or provided access to graph files (e.g. BED files) for the called peaks.

### Data access links

*May remain private before publication.*

To review GEO accession GSE108869:  
Go to <https://www.ncbi.nlm.nih.gov/geo/query/acc.cgi?acc=GSE108869>  
Enter token sravksipjstfmz into the box

### Files in database submission

GSM2915162 FLAG\_FLAG\_ChIPSeq  
GSM2915163 FLAG-CTCF\_FLAG\_ChIPSeq  
GSM2915164 FLAG-CTCF-s\_FLAG\_ChIPSeq  
GSM2915165 Control\_Input  
GSM2915166 Control\_CTCF\_ChIPSeq  
GSM2915167 CTCF-s\_OE\_Input  
GSM2915168 CTCF-s\_OE\_CTCF\_ChIPSeq  
GSM2915169 FLAG\_rep1.RNA-Seq  
GSM2915170 FLAG\_rep2.RNA-Seq  
GSM2915171 FLAG-CTCF\_rep1.RNA-Seq  
GSM2915172 FLAG-CTCF\_rep2.RNA-Seq  
GSM2915173 FLAG-CTCF-s\_rep1.RNA-Seq  
GSM2915174 FLAG-CTCF-s\_rep2.RNA-Seq  
GSM2915175 CtrlshRNA\_rep1.RNA-Seq  
GSM2915176 CtrlshRNA\_rep2.RNA-Seq  
GSM2915177 shCTCF-s\_rep1.RNA-Seq  
GSM2915178 shCTCF-s\_rep2.RNA-Seq  
GSM2915179 shCTCF#1.RNA-Seq  
GSM2915180 shCTCF#2.RNA-Seq  
GSM2915181 shboth#1.RNA-Seq  
GSM2915182 shboth#2.RNA-Seq  
GSM2974085 Control\_CTCF-HiChIP\_rep1  
GSM2974086 Control\_CTCF-HiChIP\_rep2  
GSM2974087 CTCF-s\_OE\_CTCF-HiChIP\_rep1  
GSM2974088 CTCF-s\_OE\_CTCF-HiChIP\_rep2  
GSM2990425 Control\_RAD21\_ChIPSeq  
GSM2990426 CTCF-s\_OE\_RAD21\_ChIPSeq  
GSM3466331 biotin\_alone\_biotin\_ChIPSeq  
GSM3466332 biotin-CTCF\_OE\_biotin\_ChIPSeq  
GSM3466333 biotin-CTCF-s\_OE\_biotin\_ChIPSeq

GSE108869\_CTCF-s\_OE\_CTCF-HiChIP\_combine\_allValidPairs.hic.gz  
GSE108869\_CTCF-s\_OE\_CTCF\_ChIPSeq.narrowPeak.gz  
GSE108869\_CTCF-s\_OE\_CTCF\_ChIPSeq\_control.bw  
GSE108869\_CTCF-s\_OE\_CTCF\_ChIPSeq\_treat.bw  
GSE108869\_CTCF-s\_OE\_RAD21\_ChIPSeq\_control\_lambda.bw  
GSE108869\_CTCF-s\_OE\_RAD21\_ChIPSeq\_peaks.narrowPeak.gz  
GSE108869\_CTCF-s\_OE\_RAD21\_ChIPSeq\_treat\_pileup.bw  
GSE108869\_CTCF\_CTCF-s\_OE\_RNA-seq.tsv.gz  
GSE108869\_Control\_CTCF-HiChIP\_combine\_allValidPairs.hic.gz  
GSE108869\_Control\_CTCF\_ChIPSeq.narrowPeak.gz  
GSE108869\_Control\_CTCF\_ChIPSeq\_control.bw  
GSE108869\_Control\_CTCF\_ChIPSeq\_treat.bw  
GSE108869\_Control\_RAD21\_ChIPSeq\_control\_lambda.bw  
GSE108869\_Control\_RAD21\_ChIPSeq\_peaks.narrowPeak.gz  
GSE108869\_Control\_RAD21\_ChIPSeq\_treat\_pileup.bw  
GSE108869\_FLAG-CTCF-s.narrowPeak.gz  
GSE108869\_FLAG-CTCF-s\_control\_lambda.bw  
GSE108869\_FLAG-CTCF-s\_treat\_pileup.bw  
GSE108869\_FLAG-CTCF.narrowPeak.gz  
GSE108869\_FLAG-CTCF\_control\_lambda.bw  
GSE108869\_FLAG-CTCF\_treat\_pileup.bw  
GSE108869\_Knockdown\_RNA-seq.tsv.gz  
GGSE108869\_biotin-CTCF-s\_bioChIP\_redup\_with\_SPMR\_peaks.narrowPeak.gz  
GSE108869\_biotin-CTCF-s\_sorted\_control\_lambda.bw  
GSE108869\_biotin-CTCF-s\_treat\_pileup.bw  
GSE108869\_biotin-CTCF\_bioChIP\_redup\_with\_SPMR\_peaks.narrowPeak.gz  
GSE108869\_biotin-CTCF\_sorted\_control\_lambda.bw  
GSE108869\_biotin-CTCF\_treat\_pileup.bw

### Genome browser session

(e.g. [UCSC](#))

N/A

deeptools (v2.2.4), ChIP-seq heatmap generation.  
homer, Peak annotation and de novo motif finding.

## Flow Cytometry

### Plots

Confirm that:

- The axis labels state the marker and fluorochrome used (e.g. CD4-FITC).
- The axis scales are clearly visible. Include numbers along axes only for bottom left plot of group (a 'group' is an analysis of identical markers).
- All plots are contour plots with outliers or pseudocolor plots.
- A numerical value for number of cells or percentage (with statistics) is provided.

### Methodology

Sample preparation

Cells were seeded in 6-well plates and harvested at a density of  $6 \times 10^5$  cells/ml, and then washed twice with ice-cold PBS. Cells were suspended with  $100 \mu\text{l}$   $1 \times$  binding buffer containing  $5 \mu\text{l}$  of Annexin V-FITC and  $5 \mu\text{l}$  of propidium iodide (PI) and incubated for 10 min in dark at room temperature.

Instrument

BD LSRFortessa Cell Analyzer (Becton-Dickinson, CA, USA)

Software

FLowJo software

Cell population abundance

We gated the main cell population and used 104 cells for further apoptosis analysis. As we did not performed cell sorting, therefore we did not determined the purity of the samples.

Gating strategy

We performed PI and and Annexin V-FITC staining and used unstained sample as negative control, and PI or Annexin V-FITC single-stained cells as positive controls to gate the cell population.

- Tick this box to confirm that a figure exemplifying the gating strategy is provided in the Supplementary Information.
